# Supplementary material for: Ammonium Bisphosphonate Polymeric Magnetic Nanocomplexes for Platinum Anticancer Drug Delivery and Imaging with Potential Hyperthermia and Temperature-Dependent Drug Release
Source: Hindawi journal article supplement (doi:10.1155/2018/4341580), 2018-08-05
Supplement: f1 [file 4341580.f1.docx]

**SUPPLEMENTARY MATERIAL**

Rui Zhang,† Benjamin Fellows,‡ Nikorn Pothayee,*§ Nan Hu,† Nipon Pothayee,† Ami Jo,† Ana C. Bohórquez,∥ Carlos Rinaldi,∥ Olin Thompson Mefford,‡ Richey M. Davis† and Judy S. Riffle*†

†Department of Chemistry, Department of Chemical Engineering, and Macromolecules Innovation Institute, Virginia Tech, Blacksburg, VA 24061

‡Department of Materials Science and Engineering and the Center for Optical Materials Science and Engineering (COMSET), Clemson University, Clemson, SC 29634

§Laboratory of Functional and Molecular Imaging, National Institute of Neurological Disorders and Stroke, National Institutes of Health, Bethesda, MD 20892

∥J. Crayton Pruitt Family Department of Biomedical Engineering and Department of Chemical Engineering, University of Florida, Gainesville, FL 32611

*Corresponding Author E-mail: [jriffle@vt.edu](mailto:jriffle@vt.edu)

The experimental setup for calorimetric measurements is shown in Fig. S1. Data was collected using an EasyHeat Induction Heating System produced by Ameritherm. The five-turn induction coil contained a polycarbonate recirculating water bath designed to regulate sample temperature. The temperature changes in each sample were measured using a fiber optic temperature sensor from NeoptixTM. The sample was allowed to reach thermal equilibrium prior to turning on the magnetic field. Temperature was recorded every five seconds. Measurements were conducted at a frequency of 205 kHz and a magnetic field strength of 30 kA m-1 that was verified using an AC field probe (AMF Life Science). The hexyl *MGICs* dispersion (3.5 mg mL-1, 0.5 mL) was used to measure the heating rate. The SAR of the *MGICs* was calculated from its heat capacity (C), the initial slope of the temperature versus time curve (ΔT/Δt, K s-1), and the total mass of the *MGICs* dispersion, divided by the mass of iron as determined from ICP-AES.[1]


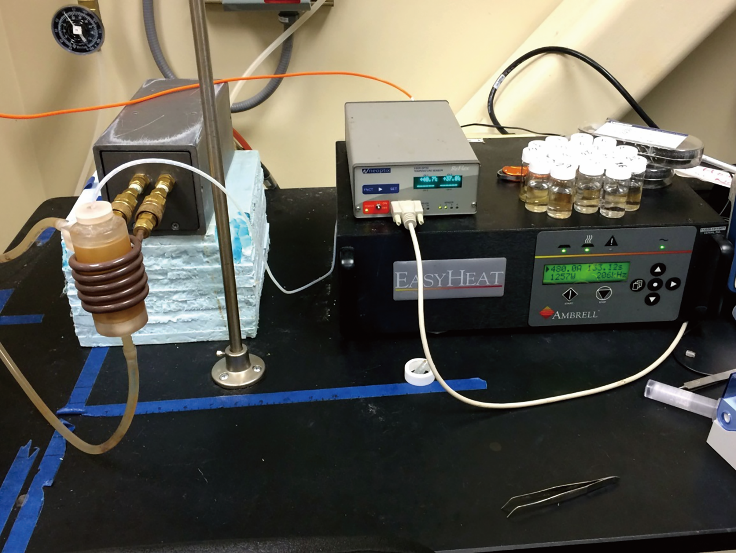


**Fig. S1** Experimental setup for calorimetric measurements

Synthetic methods for the monomers as well as the graft copolymers have been described in our previous papers.[2, 3]The synthetic scheme for the hexylamino bisphosphonate methacrylate monomer is shown in Fig. S2. The propylamino bisphosphonate methacrylate monomer can be prepared by the same procedure, by using 3-amino-1-propanol instead of 6-amino-1-hexanol. The acrylate-functional PEO oligomer was synthesized by reacting a commercial ~5000 Mn poly(ethylene oxide) monomethyl ether with freshly-distilled acryloyl chloride.

**Fig. S2** Synthesis of hexylamino bisphosphonate methacrylate monomer

Conventional free radical polymerization was utilized to synthesize the graft copolymers. The phosphonate esters were then selectively hydrolyzed without affecting the carboxylic esters by a mild approach previous reported by our group. The synthetic scheme for the polymerization and selective hydrolysis is shown in Fig. S3.

**Fig. S3** Synthesis of poly(hexyl ammonium bisphosphonic acid methacrylate)-*g*-PEO copolymers

1H and 31P NMR spectra of the poly(propyl ammonium bisphosphonate methacrylate)-g-PEO before and after phosphonate ester hydrolysis are shown in Fig. S4 and S5. The poly(hexyl ammonium bisphosphonate methacrylate)-g-PEO had similar spectra. Due to solubility issues, the graft copolymers before and after selective hydrolysis were analyzed in different deuterated solvents. The 1H NMR spectra featured the disappearance of protons corresponding to the methyl and methylene groups of the phosphonate esters (peaks h and i in the top spectrum in Fig. S4). The methyl protons (peak i) had a chemical shift at ~1.3 ppm, and this peak completely disappeared after hydrolysis. The methylene protons on the phosphonate esters (peak h) had a chemical shift of 4 ppm, very close to the methylene proton resonance on the carboxylic ester of the bisphosphonate graft segment (peak c). Before hydrolysis, peaks c and h combined indicated that 10 Hs per phosphonate monomer unit were present. After selective hydrolysis, only 2 Hs remained due to the carboxylic ester methylene. This was confirmed by the integrals in the spectra. The protons on the poly(ethylene oxide) segment (peaks l and m) remained unchanged, indicating that the carboxylic esters on the PEO segment were not affected by the hydrolysis procedure. The spectra indicated that the phosphonate esters had been selectively deprotected, with little to no effects on the carboxylic esters. 31P NMR spectra (Fig. S5) further demonstrated the success of the removal of the phosphonate esters. The single phosphorus resonance shifted from 31 to 16 ppm, which was in good agreement with our previous study with polymer end groups.[2]

**
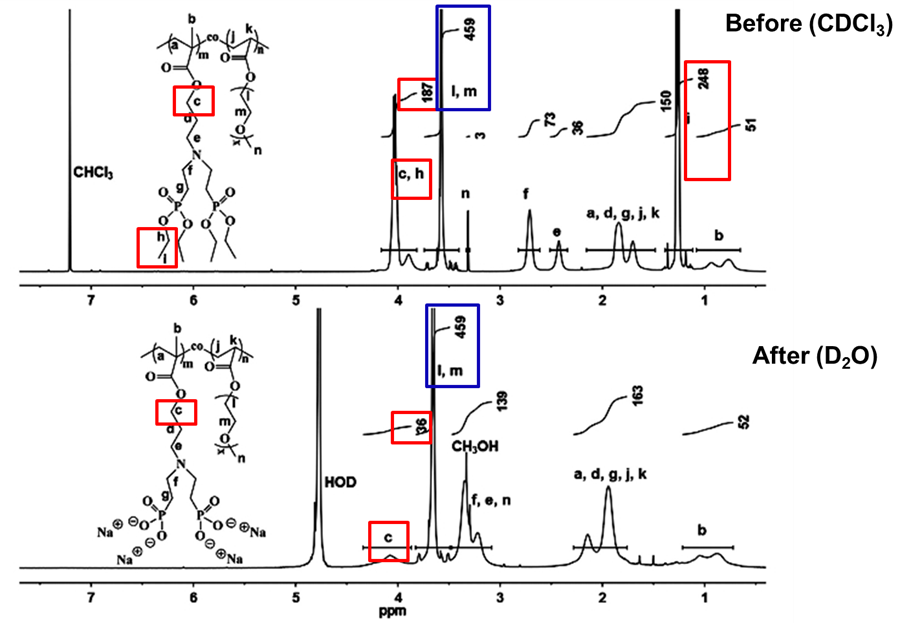
**

**Fig. S4** 1H NMR spectra show successful deprotection of the phosphonate esters of the poly(propyl ammonium bisphosphonate methacrylate)-*g*-PEO copolymers with minimal effect on carboxylic esters


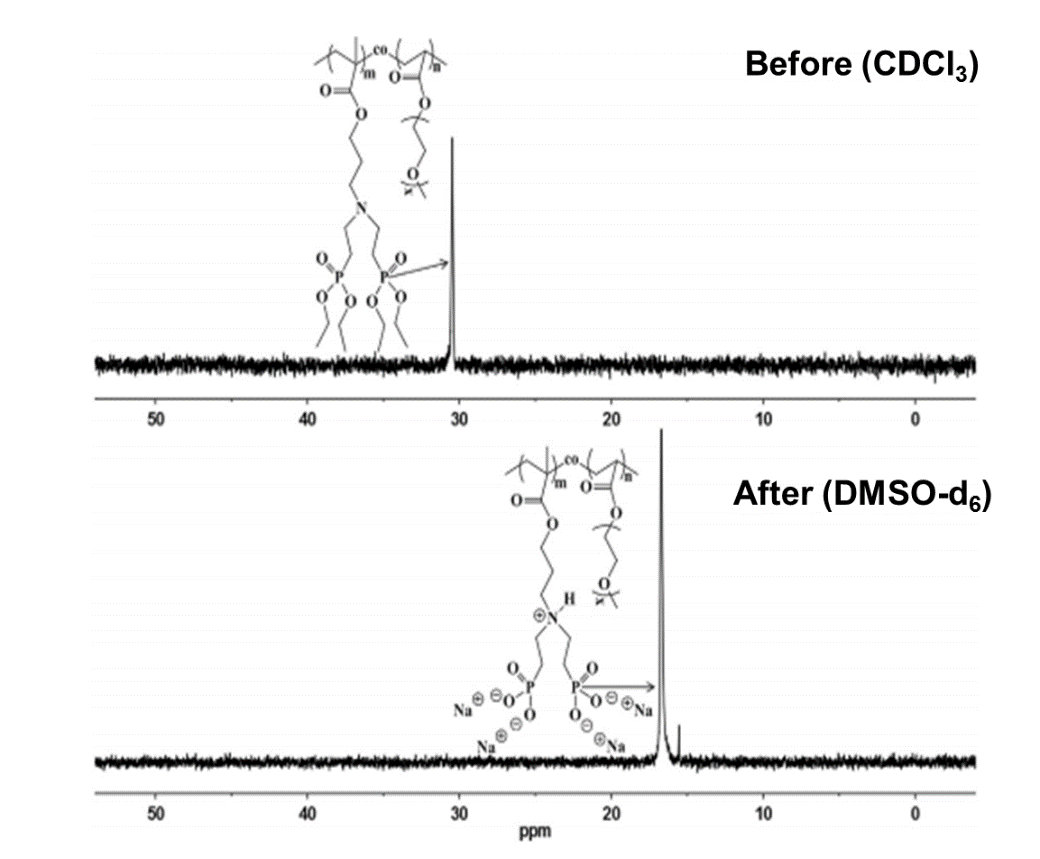


**Fig. S5** 31P NMR spectra of the poly(propyl ammonium bisphosphonate methacrylate)-*g*-PEO

The 1H NMR spectrum of the PEO-*g*-PAA is shown in Fig. S6. The integrals indicated that there were ~75 acrylate repeat units per PEO graft. Based on this, the graft copolymer contained about 50 wt% of PEO and 50 wt% of poly(sodium acrylate).

**
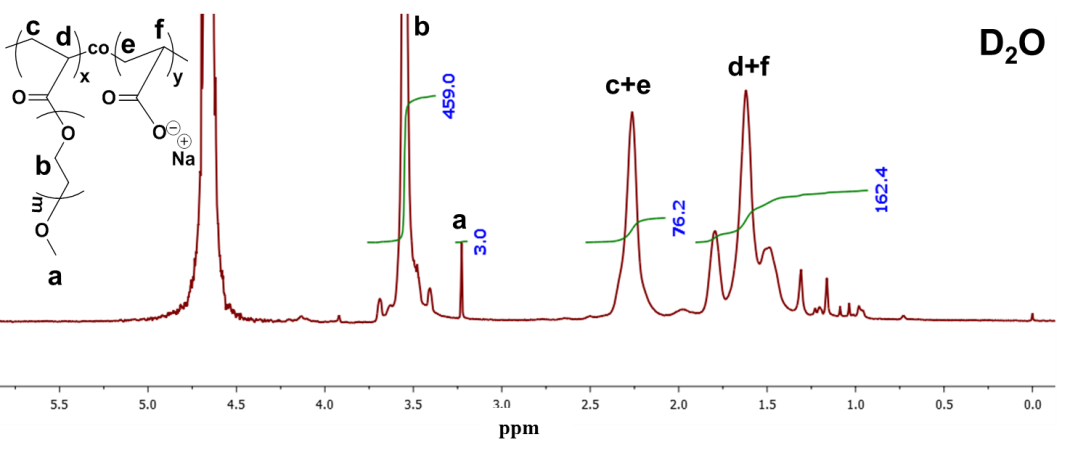
**

**Fig. S6** 1H NMR spectrum of the PEO-*g*-PAA

**
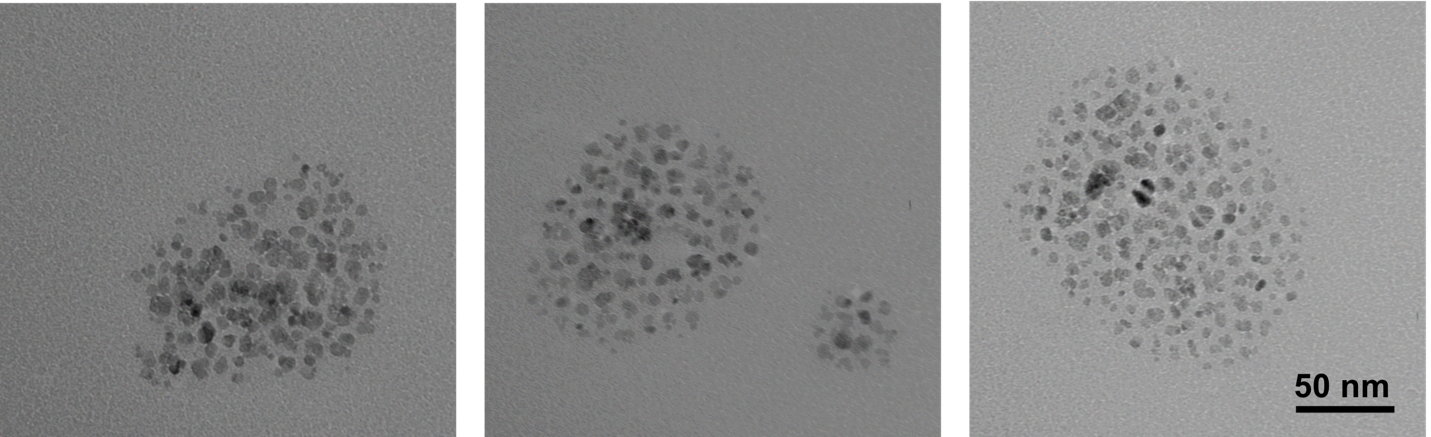
**

**Fig. S7** Additional representative images of *MGICs* following complexation with copolymers that led to a cluster formation.

[1] E. C. Vreeland, J. Watt, G. B. Schober, et al., "Enhanced Nanoparticle Size Control by Extending LaMer’s Mechanism," *Chemistry of Materials*, vol. 27, no. 17, pp. 6059-6066, 2015.

[2] N. Hu, L. M. Johnson, N. Pothayee, et al., "Synthesis of ammonium bisphosphonate monomers and polymers," *Polymer*, vol. 54, no. 13, pp. 3188-3197, 2013.

[3] N. Pothayee, N. Pothayee, N. Hu, et al., "Manganese graft ionomer complexes (MaGICs) for dual imaging and chemotherapy," *Journal of Materials Chemistry B*, vol. 2, no. 8, pp. 1087-1099, 2014.
